# Supplementary material for: Development and application of the Round-trip Drifting Sounding System (RDSS)
Source: Copernicus journal article supplement (doi:10.5194/egusphere-2025-2012), 2025-06-17

## Application Certificate

To Whom It May Concern,

The Round-trip Drifting Sounding System (RDSS) has been widely and effectively applied in the daily operational regional numerical weather prediction model (CMA-TRAMS) of our institute since January 2024.

After assimilation processing, the data collected by this system can provide more accurate and comprehensive basic information for the regional numerical weather prediction model, effectively improving the prediction effect. It has significantly enhanced the accuracy and timeliness of the prediction results, and provided strong technical support for the smooth development of relevant scientific research work in our institute.

Hereby certify.

Guangzhou Institute of Tropical Marine Meteorology, CMA

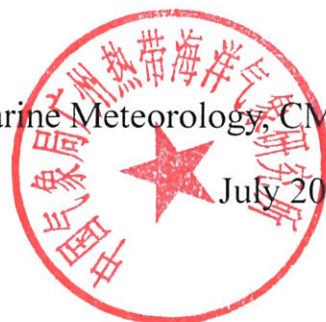

Supplement: Supplementary file [file Application Certificate.PDF › Application Certificate.PDF]
